# Supplementary material for: In situ iodination and X-ray crystal structure of a foldamer helix bundle
Source: Royal Society of Chemistry journal article supplement (doi:10.1039/c5cc07916k), 2015-11-12
Supplement: c5cc07916k1.pdf [file c5cc07916k1.pdf]

***In situ* iodination and X-ray crystal structure of a foldamer helical bundle.**

Gavin William Collie, Karolina Pulka-Ziach and Gilles Guichard

**Supplementary information**

**Table S1.** X-ray diffraction data collection and refinement statistics for oligourea **H1-I<sub>2</sub>**.

| Data Collection                    |                            |
|------------------------------------|----------------------------|
| Space group                        | $P 6_3$                    |
| Unit cell                          |                            |
| a, b, c (Å)                        | 33.92, 33.92, 37.98        |
| $\alpha, \beta, \gamma$ (°)        | 90.0, 90.0, 120.0          |
| Resolution (Å)                     | 37.98 – 1.64 (1.74 – 1.64) |
| R <sub>merge</sub> (%)             | 7.0 (23.7)                 |
| I / $\sigma$                       | 8.5 (3.43)                 |
| Reflections (total)                | 12067 (1888)               |
| Reflections (unique)               | 5602 (902)                 |
| Completeness (%)                   | 92.6 (92.9)                |
| Multiplicity                       | 2.15                       |
| Refinement                         |                            |
| Resolution (Å)                     | 29.38 – 1.64 (1.68 – 1.64) |
| R <sub>work</sub> (%)              | 18.49 (30.00)              |
| R <sub>free</sub> (%)              | 25.56 (33.00)              |
| Atoms                              | 304                        |
| Waters                             | 20                         |
| Overall B-factor (Å <sup>2</sup> ) | 17.37                      |
| R.m.s.d. (bond-lengths [Å])        | 0.013                      |
| R.m.s.d. (bond-angles [°])         | 1.876                      |
| CCDC code                          | 1038892*                   |

\* As key information is lost during the .pdb file to .cif file conversion process, the entire .pdb file (including refinement information) has been inserted into the 'comments' section of the .cif file available (free of charge) from the Cambridge Crystallographic Data Centre ([www.ccdc.cam.ac.uk/getstructures](http://www.ccdc.cam.ac.uk/getstructures))

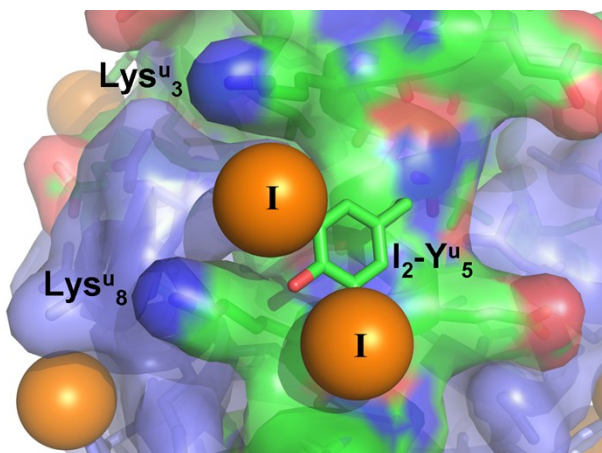

**Figure S1.** Interaction of flexible Lys<sup>u</sup><sub>3</sub> side-chains with 3,5-diiodo-Tyr<sup>u</sup><sub>5</sub> side-chain within the **H1-I<sub>2</sub>** crystal structure.
